# Supplementary material
Source: publisher figshare collection journal article supplement (https://asha.figshare.com/articles/dataset/_/16879603)
Supplement: Supplementary file 1 [file 1]

**Supplemental Material S1.** Male data correlation matrix.

|   | A. Breathiness | B. Overall severity | C. Roughness | D. Strain | E. Loudness | F. Pitch | G. Pitch Range | H. Speaking $f_0$ | I. Speaking $f_0$ SD | J. CPPspeech | K. CPPspeech SD | L. CSIDspeech | M. CPPvowel | N. CPPvowel SD | O. CSIDvowel | P. Mean airflow | Q. Mean peak air pressure | R. Mean intensity | S. Minimum $f_0$ | T. Maximum $f_0$ | U. Speaking $f_0$ range | V. Mean $f_0$ |
|---|----------------|---------------------|--------------|-----------|-------------|----------|----------------|-------------------|----------------------|--------------|-----------------|---------------|-------------|----------------|--------------|-----------------|---------------------------|-------------------|------------------|------------------|-------------------------|---------------|
| A | 1              |                     |              |           |             |          |                |                   |                      |              |                 |               |             |                |              |                 |                           |                   |                  |                  |                         |               |
| B | .56            | 1                   |              |           |             |          |                |                   |                      |              |                 |               |             |                |              |                 |                           |                   |                  |                  |                         |               |
| C | .30            | .62                 | 1            |           |             |          |                |                   |                      |              |                 |               |             |                |              |                 |                           |                   |                  |                  |                         |               |
| D | .33            | .64                 | .43          | 1         |             |          |                |                   |                      |              |                 |               |             |                |              |                 |                           |                   |                  |                  |                         |               |
| E | .26            | .45                 | .21          | .32       | 1           |          |                |                   |                      |              |                 |               |             |                |              |                 |                           |                   |                  |                  |                         |               |
| F | .15            | .43                 | .27          | .40       | .46         | 1        |                |                   |                      |              |                 |               |             |                |              |                 |                           |                   |                  |                  |                         |               |
| G | -.38           | -.39                | -.20         | -.30      | -.33        | -.22     | 1              |                   |                      |              |                 |               |             |                |              |                 |                           |                   |                  |                  |                         |               |
| H | .35            | .33                 | .16          | .35       | .28         | .40      | -.29           | 1                 |                      |              |                 |               |             |                |              |                 |                           |                   |                  |                  |                         |               |
| I | .04            | .16                 | .09          | .20       | .17         | .27      | .02            | .52               | 1                    |              |                 |               |             |                |              |                 |                           |                   |                  |                  |                         |               |
| J | -.40           | -.48                | -.29         | -.33      | -.35        | -.26     | .24            | -.27              | -.22                 | 1            |                 |               |             |                |              |                 |                           |                   |                  |                  |                         |               |
| K | -.44           | -.41                | -.24         | -.33      | -.30        | -.18     | .22            | -.34              | -.16                 | .38          | 1               |               |             |                |              |                 |                           |                   |                  |                  |                         |               |
| L | .51            | .54                 | .35          | .44       | .35         | .28      | -.29           | .33               | .18                  | -.79         | -.68            | 1             |             |                |              |                 |                           |                   |                  |                  |                         |               |
| M | -.49           | -.51                | -.36         | -.34      | -.31        | -.29     | .41            | -.27              | -.11                 | .70          | .42             | -.68          | 1           |                |              |                 |                           |                   |                  |                  |                         |               |
| N | .14            | .18                 | .24          | .06       | .02         | .07      | -.14           | -.02              | -.10                 | -.31         | -.07            | .22           | -.44        | 1              |              |                 |                           |                   |                  |                  |                         |               |
| O | .41            | .52                 | .41          | .33       | .31         | .32      | -.36           | .22               | .11                  | -.65         | -.34            | .62           | -.89        | .61            | 1            |                 |                           |                   |                  |                  |                         |               |
| P | .49            | .36                 | .18          | .25       | .19         | .07      | -.22           | .16               | .03                  | -.27         | -.32            | .38           | -.38        | .07            | .30          | 1               |                           |                   |                  |                  |                         |               |
| Q | .30            | .39                 | .32          | .37       | .14         | .24      | -.16           | .32               | .16                  | -.23         | -.33            | .40           | -.27        | .02            | .24          | .29             | 1                         |                   |                  |                  |                         |               |
| R | .20            | .08                 | .08          | .05       | -.07        | -.05     | -.19           | .13               | -.09                 | .06          | .00             | .01           | .00         | .06            | -.01         | .21             | .36                       | 1                 |                  |                  |                         |               |
| S | .27            | .29                 | .11          | .29       | .25         | .31      | -.45           | .65               | .20                  | -.20         | -.29            | .28           | -.21        | -.09           | .09          | .10             | .26                       | .16               | 1                |                  |                         |               |
| T | -.30           | -.26                | -.15         | -.16      | -.21        | -.05     | .84            | .02               | .12                  | .16          | .09             | -.17          | .34         | -.18           | -.33         | -.21            | -.04                      | -.15              | .04              | 1                |                         |               |
| U | .00            | .10                 | .07          | .12       | .09         | .13      | .09            | .30               | .78                  | -.13         | -.06            | .09           | -.05        | -.09           | .03          | -.03            | .10                       | -.16              | .10              | .12              | 1                       |               |
| V | .30            | .28                 | .10          | .34       | .27         | .29      | -.40           | .71               | .26                  | -.18         | -.29            | .29           | -.24        | -.02           | .18          | .14             | .40                       | .39               | .63              | -.10             | .15                     | 1             |
