# Supplementary material
Source: publisher figshare collection journal article supplement (https://asha.figshare.com/articles/dataset/_/16879603)
Supplement: Supplementary file 2 [file 1]

**Supplemental Material S2.** Female data correlation matrix.

|   | A. Breathiness | B. Overall severity | C. Roughness | D. Strain | E. Loudness | F. Pitch | G. Pitch Range | H. Speaking $f_0$ | I. Speaking $f_0$ SD | J. CPPspeech | K. CPPspeech SD | L. CSIDspeech | M. CPPvowel | N. CPPvowel SD | O. CSIDvowel | P. Mean airflow | Q. Mean peak air pressure | R. Mean intensity | S. Minimum $f_0$ | T. Maximum $f_0$ | U. Speaking $f_0$ range | V. Mean $f_0$ |
|---|----------------|---------------------|--------------|-----------|-------------|----------|----------------|-------------------|----------------------|--------------|-----------------|---------------|-------------|----------------|--------------|-----------------|---------------------------|-------------------|------------------|------------------|-------------------------|---------------|
| A | 1              |                     |              |           |             |          |                |                   |                      |              |                 |               |             |                |              |                 |                           |                   |                  |                  |                         |               |
| B | .53            | 1                   |              |           |             |          |                |                   |                      |              |                 |               |             |                |              |                 |                           |                   |                  |                  |                         |               |
| C | .33            | .64                 | 1            |           |             |          |                |                   |                      |              |                 |               |             |                |              |                 |                           |                   |                  |                  |                         |               |
| D | .29            | .65                 | .49          | 1         |             |          |                |                   |                      |              |                 |               |             |                |              |                 |                           |                   |                  |                  |                         |               |
| E | .33            | .42                 | .18          | .28       | 1           |          |                |                   |                      |              |                 |               |             |                |              |                 |                           |                   |                  |                  |                         |               |
| F | .34            | .44                 | .37          | .32       | .10         | 1        |                |                   |                      |              |                 |               |             |                |              |                 |                           |                   |                  |                  |                         |               |
| G | -.21           | -.28                | -.23         | -.19      | -.20        | -.24     | 1              |                   |                      |              |                 |               |             |                |              |                 |                           |                   |                  |                  |                         |               |
| H | .09            | .06                 | -.07         | .10       | .05         | -.27     | -.01           | 1                 |                      |              |                 |               |             |                |              |                 |                           |                   |                  |                  |                         |               |
| I | .01            | .03                 | .04          | .08       | .02         | -.11     | .18            | .34               | 1                    |              |                 |               |             |                |              |                 |                           |                   |                  |                  |                         |               |
| J | -.33           | -.53                | -.31         | -.38      | -.40        | -.14     | .30            | -.22              | -.14                 | 1            |                 |               |             |                |              |                 |                           |                   |                  |                  |                         |               |
| K | -.40           | -.39                | -.18         | -.23      | -.29        | -.20     | .28            | -.19              | -.01                 | .50          | 1               |               |             |                |              |                 |                           |                   |                  |                  |                         |               |
| L | .34            | .43                 | .26          | .27       | .30         | .11      | -.27           | .21               | .10                  | -.75         | -.68            | 1             |             |                |              |                 |                           |                   |                  |                  |                         |               |
| M | -.39           | -.48                | -.30         | -.33      | -.32        | -.19     | .27            | -.14              | -.03                 | .62          | .49             | -.50          | 1           |                |              |                 |                           |                   |                  |                  |                         |               |
| N | .13            | .37                 | .34          | .26       | .17         | .09      | -.11           | -.07              | .05                  | -.37         | -.17            | .24           | -.43        | 1              |              |                 |                           |                   |                  |                  |                         |               |
| O | .29            | .51                 | .35          | .33       | .33         | .18      | -.27           | .10               | .00                  | -.59         | -.39            | .50           | -.83        | .59            | 1            |                 |                           |                   |                  |                  |                         |               |
| P | .39            | .30                 | .21          | .17       | .04         | .28      | -.14           | -.04              | -.04                 | -.19         | -.16            | .20           | -.24        | .03            | .14          | 1               |                           |                   |                  |                  |                         |               |
| Q | .19            | .30                 | .30          | .29       | .02         | .11      | -.01           | .14               | .12                  | -.17         | -.19            | .22           | -.08        | .03            | .10          | .21             | 1                         |                   |                  |                  |                         |               |
| R | -.04           | -.04                | .02          | -.05      | -.16        | -.04     | .03            | -.05              | .04                  | .13          | .20             | -.12          | .25         | -.06           | -.21         | .15             | .36                       | 1                 |                  |                  |                         |               |
| S | -.07           | -.05                | -.11         | -.01      | .07         | -.09     | -.47           | .34               | .03                  | -.06         | -.10            | .10           | -.03        | -.20           | .02          | .00             | -.04                      | -.05              | 1                |                  |                         |               |
| T | -.31           | -.36                | -.34         | -.24      | -.18        | -.33     | .77            | .17               | .18                  | .32          | .27             | -.25          | .32         | -.31           | -.32         | -.16            | -.03                      | .01               | .13              | 1                |                         |               |
| U | -.13           | .01                 | .00          | .03       | .00         | -.11     | .28            | .16               | .65                  | -.06         | .07             | .04           | .03         | -.01           | -.05         | -.07            | .04                       | -.01              | .00              | .32              | 1                       |               |
| V | -.05           | -.05                | -.10         | .02       | .04         | -.26     | -.03           | .57               | .18                  | -.09         | -.05            | .13           | -.08        | -.13           | .06          | -.06            | .20                       | .08               | .37              | .23              | .15                     | 1             |
